# Supplementary material for: Liver and Adipose Expression Associated SNPs Are Enriched for Association to Type 2 Diabetes
Source: PLoS Genet. 2010 May 6;6(5):e1000932. doi: 10.1371/journal.pgen.1000932 (PMC2865508; doi:10.1371/journal.pgen.1000932)
Supplement: Figure S1 — SNP Sets Average log (PT2D) from the three GWAS. The Y axis shows the average of −log (PT2D). PT2D are from the DIAGRAM, WTCCC, and DGI studies, from left to right. In each GWAS cohort, from left to right, the first bar shows the average of −log (PT2D) of all studied SNPs; the second bar shows the average of −log (PT2D) of all eSNPs, the third bar shows the average of −log (PT2D) of adipose network eSNPs; the fourth bar shows the average of −log (PT2D) of T2d adipose causal subnetwork eSNPs. In DIAGRAM, the second bar is higher than the first (P = 1.37×10−9), the third is higher than the second P = 1.21×10−4), and the fourth is higher than the third (P = 1.22×10−4). In the WTCCC study, the second bar is higher than the first (P = 1.01×10−3), the third is not statistically distinguishable from the second (P = 0.07), and the fourth is marginally higher than the third (P = 0.04). In the DGI study, the second bar is higher than the first (P = 5.83×10−3), the third is higher than the second (P = 8.48×10−4), and the fourth is higher than the third (P = 1.17×10−7). (0.03 MB DOC) [file pgen.1000932.s001.doc]

**Figure S1. SNP Sets Average log (PT2D) from the three GWAS**. The Y axis shows the average of –log (PT2D). PT2D are from the DIAGRAM, WTCCC, and DGI studies, from left to right. In each GWAS cohort, from left to right, the first bar shows the average of –log (PT2D) of all studied SNPs; the second bar shows the average of –log (PT2D) of all eSNPs, the third bar shows the average of –log (PT2D) of adipose network eSNPs; the fourth bar shows the average of –log (PT2D) of T2d adipose causal subnetwork eSNPs. In DIAGRAM, the second bar is higher than the first (P=1.37 × 10-9), the third is higher than the second P=1.21 × 10-4), and the fourth is higher than the third (P=1.22 × 10-4). In the WTCCC study, the second bar is higher than the first (P= 1.01 × 10-3), the third is not statistically distinguishable from the second (P=0.07), and the fourth is marginally higher than the third (P=0.04). In the DGI study, the second bar is higher than the first (P= 5.83 × 10-3), the third is higher than the second (P= 8.48 × 10-4), and the fourth is higher than the third (P= 1.17 × 10-7).
